# Supplementary material
Source: PubMed Central journal article supplement (PMC4261608)
Supplement: NIHMS61385-supplement-STable5.pdf [file NIHMS61385-supplement-STable5.pdf]

**Supplementary Table 5. Literature Evidence for Alternate Spatio/Functional Distribution of Glycolytic Enzymes**

| gene   | protein name                                                                                                                                                             | literature location <sup>1</sup> | experimental function                                                       | reference <sup>2</sup>           | Direct Antibody Detection <sup>3</sup> | Nuclear Protein interactions <sup>4</sup>                                      |
|--------|--------------------------------------------------------------------------------------------------------------------------------------------------------------------------|----------------------------------|-----------------------------------------------------------------------------|----------------------------------|----------------------------------------|--------------------------------------------------------------------------------|
| ALDOA  | Fructose-bisphosphatealdolase A                                                                                                                                          | N<br>En                          | protection against cell senescence<br>distribution of V-ATPase compartments | PMID: 14985089<br>PMID: 21307348 | -                                      | BCAT2, EGFR, MLH1, PIAS4                                                       |
| ALDOC  | Fructose-bisphosphatealdolase C                                                                                                                                          | N                                | maintenance of chromatin structure                                          | PMID:9443807                     | -                                      | -                                                                              |
| ENO1   | Isoform alpha-enolase of Alpha-enolase<br>Isoform alpha-enolase of Alpha-enolase<br>c-myc promoter binding protein 1 (MBP-1)<br>c-myc promoter binding protein 1 (MBP-1) | P                                | plasminogen activation                                                      | PMID: 12666133                   | -                                      | ACHE, AGTPBP1, BHLHE40, EP300,<br>GRB2, TSG101,                                |
|        |                                                                                                                                                                          | ?                                | stimulation of IgM production                                               | PMID: 1369209                    |                                        |                                                                                |
|        |                                                                                                                                                                          | N                                | repression of c-myc gene expression                                         | PMID: 20886042                   |                                        |                                                                                |
|        |                                                                                                                                                                          | N                                | p53-p21 dependent senescence                                                | PMID: 18852884                   |                                        |                                                                                |
| ENO2   | Gamma-enolase                                                                                                                                                            | M                                | Import of tRNA to mitochondria                                              | PMID: 20348443                   | -                                      | HABP4, HSF1, SNUPN                                                             |
|        |                                                                                                                                                                          | P                                | neurotrophic activity                                                       | PMID: 21358174                   |                                        |                                                                                |
| FBP1   | Fructose-1,6-bisphosphatase 1                                                                                                                                            | N                                | S and G2 phase cell cycle                                                   | PMID: 22057438                   | -                                      | ASL, BIN1                                                                      |
| G6PD   | Glucose-6-phosphate 1-dehydrogenase                                                                                                                                      | P                                | VEGF-mediated cellular responses                                            | PMID:19359662                    | S                                      | -                                                                              |
| GAPDH  | Glyceraldehyde-3-phosphate dehydrogenase                                                                                                                                 | N                                | Oct-1 transcription during S phase                                          | PMID: 18682386                   | -                                      | EGFR, KAT5, MAP3K14, MAPK1,<br>MDM2, PRDX1, PSEN1,<br>RPA2,SERPINB9, SGK1, TXN |
|        |                                                                                                                                                                          | N                                | SET inhibition of cyclinB-cdk1 activity                                     | PMID: 16474839                   |                                        |                                                                                |
|        |                                                                                                                                                                          | N                                | ubiquitination and degradation of N-CoR                                     | PMID: 15951807                   |                                        |                                                                                |
|        |                                                                                                                                                                          | M                                | pro-apoptotic association with VDAC1                                        | PMID: 17072346                   |                                        |                                                                                |
|        |                                                                                                                                                                          | M                                | anti-apoptotic reversal of depolarization                                   | PMID: 17540177                   |                                        |                                                                                |
|        |                                                                                                                                                                          | R/G                              | membrane trafficking                                                        | PMID: 19106097                   |                                        |                                                                                |
|        |                                                                                                                                                                          | S                                | switch to pentose phosphate pathway                                         | PMID: 18154684                   |                                        |                                                                                |
| GPI    | Glucose-6-phosphate isomerase<br>Autocrine motility factor                                                                                                               | R                                | Ca2+ related stress regulation                                              | PMID: 21252914                   | N,P,S                                  | -                                                                              |
|        |                                                                                                                                                                          | R                                | regulation of ubiquitin ligase                                              | PMID: 19603112                   |                                        |                                                                                |
| HK1    | Hexokinase-1                                                                                                                                                             | M<br>P                           | binding to VDAC<br>macrophage activation                                    | PMID: 12756287<br>PMID: 8484732  | N,M                                    | MAX, SCMHI                                                                     |
| PFKL   | 6-phosphofructokinase, liver type                                                                                                                                        | P                                | Binding to vacuolar-type ATPase                                             | PMID: 18632794                   | -                                      | ATN1, COPS6, IKBKE, NFKB2,<br>RELB, TNFRSF1A                                   |
| PFKP   | 6-phosphofructokinase type C                                                                                                                                             | -                                |                                                                             |                                  | -                                      | EIF2C2, MAX, MCC, PRKAB1,<br>TRAF6                                             |
| PGAM1  | Phosphoglyceratemutase 1                                                                                                                                                 | N                                |                                                                             | PMID: 22367961                   | -                                      | ARL4D, XRCC6                                                                   |
| PGD    | 6-phosphogluconate dehydrogenase                                                                                                                                         | -                                |                                                                             |                                  | -                                      | CDK4, IKBKE, NAA38, PRKAB1,<br>TRAF6                                           |
| PGK1   | Phosphoglycerate kinase 1                                                                                                                                                | N                                | DNA polymerase cofactor                                                     | PMID: 2324090                    | -                                      | -                                                                              |
| PKM2   | Isoform M2 of Pyruvate kinase                                                                                                                                            | N                                | Oct-4 transcription                                                         | PMID: 18191611                   | P,S                                    | ARRB1, ARRB2, LMO7, MDM2,<br>NDRG1, PAX8, RELA                                 |
|        |                                                                                                                                                                          | N                                | HIF1 $\alpha$ transcription cofactor                                        | PMID: 21709315                   |                                        |                                                                                |
| TALDO1 | Transaldolase                                                                                                                                                            | N                                | nuclear transport by importin $\alpha$ 5                                    | PMID: 21307607                   | -                                      | CHD3, EIF6, IKBKE, MCC, NAA38,<br>TRAF6, ZHX1                                  |
| TKT    | Transketolase                                                                                                                                                            |                                  |                                                                             |                                  | N                                      | FBXO11, IKBKE, MCC, VHL                                                        |
| TPI1   | Triosephosphateisomerase                                                                                                                                                 |                                  |                                                                             |                                  | -                                      | EFGR, SETDB1, SP1                                                              |

<sup>1</sup> Location key: N – nucleus, M – mitochondrion, En – endosome, P – plasma membrane, R – endoplasmic reticulum, G – Golgi apparatus, S – cytoplasm/cytosol.

<sup>2</sup> Pubmed identifier codes.

<sup>3</sup> Locations measured by direct, large scale antibody screening in the Human Protein Atlas project (Barbe, L. et al. Toward a Confocal Subcellular Atlas of the Human Proteome. Molecular & Cellular Proteomics 2008. 7, 499).

<sup>4</sup> Proteins with GO CC annotation of nucleus with which the glycolytic protein has direct physical association in the IntAct database (Kerrien S et al, The IntAct molecular interaction database in 2012. Nucleic Acids Res. 2012, 40, D841-6.). Only human interactions are included. In all cases, the glycolytic enzyme was a prey.
